# Supplementary material
Source: publisher site journal article supplement (https://www.dovepress.com/article/243665)
Supplement: Supplementary file 1 [file get_supplementary_file.php]

# **Supplementary Table. MPR of AHT drugs based on different variables**

| **Variables** | **Benazepril** | **Nifedipine GITs** | **Amlodipine** | **Metoprolol** | **Valsartan** | **Indapamide** | **Valsartan/Amlodipine FDC** |
| --- | --- | --- | --- | --- | --- | --- | --- |
| Gender |  |  |  |  |  |  |  |
| Male | 0.27 | 0.60 | 0.39 | 0.20 | 0.53 | 0.42 | 0.47 |
| Female | 0.28 | 0.61 | 0.39 | 0.18 | 0.52 | 0.39 | 0.53 |
| Age |  |  |  |  |  |  |  |
| 18-40 | 0.21 | 0.50 | 0.33 | 0.20 | 0.45 | 0.22 | 0.36 |
| 41-60 | 0.29 | 0.59 | 0.38 | 0.20 | 0.52 | 0.38 | 0.51 |
| 61-80 | 0.28 | 0.63 | 0.40 | 0.19 | 0.54 | 0.43 | 0.50 |
| 81+ | 0.24 | 0.59 | 0.38 | 0.18 | 0.52 | 0.43 | 0.49 |
| City level |  |  |  |  |  |  |  |
| Municipalities | 0.34 | 0.65 | 0.48 | 0.18 | 0.60 | 0.45 | 0.67 |
| Provincial capital cities | 0.21 | 0.51 | 0.31 | 0.21 | 0.47 | 0.32 | 0.40 |
| Prefecture level cities | 0.21 | 0.47 | 0.39 | 0.17 | 0.42 | 0.41 | 0.47 |
| First prescription source |  |  |  |  |  |  |  |
| Tier 3 hospitals | 0.30 | 0.64 | 0.43 | 0.25 | 0.60 | 0.40 | 0.51 |
| Tier 2 hospitals | 0.28 | 0.61 | 0.44 | 0.16 | 0.58 | 0.46 | 0.55 |
| Tier 2 hospitals | 0.27 | 0.60 | 0.37 | 0.16 | 0.49 | 0.37 | 0.49 |
| Pharmacies | 0.14 | 0.44 | 0.19 | 0.19 | 0.35 | 0.60 | 0.14 |
| Comorbidities |  |  |  |  |  |  |  |
| None | 0.22 | 0.52 | 0.35 | 0.20 | 0.49 | 0.38 | 0.46 |
| Diabetes mellitus | 0.33 | 0.64 | 0.43 | 0.19 | 0.56 | 0.43 | 0.54 |
| Stroke | 0.35 | 0.67 | 0.45 | 0.17 | 0.58 | 0.43 | 0.55 |
| Coronary heart disease | 0.31 | 0.64 | 0.43 | 0.18 | 0.56 | 0.43 | 0.55 |
| Peripheral vascular diseases | 0.42 | 0.67 | 0.52 | 0.17 | 0.62 | 0.37 | 0.76 |
| Chronic renal diseases | 0.35 | 0.64 | 0.43 | 0.18 | 0.60 | 0.35 | 0.45 |
| Hospitalization |  |  |  |  |  |  |  |
| Yes | 0.23 | 0.55 | 0.38 | 0.18 | 0.50 | 0.36 | 0.45 |
| No | 0.29 | 0.62 | 0.39 | 0.20 | 0.54 | 0.42 | 0.51 |

FDC, fixed-dose combination; GITs, gastrointestinal tablets
